# Supplementary material for: Using affective knowledge to generate and validate a set of emotion-related, action words
Source: PeerJ. 2015 Jul 28;3:e1100. doi: 10.7717/peerj.1100 (PMC4525695; doi:10.7717/peerj.1100)
Supplement: Supplemental Information 4 — All rating data for action word/label pairs, per participant. [file peerj-03-1100-s004.xlsx]

## Sheet: raw data_study 2
participant_number	Instruction Perspective	Rating Direction	Rating Task	Age	Sex	Happy_Scream	Happy_Smile	Happy_Jump	Happy_Cry	Happy_Recoil	Happy_Hide	Surprise_Scream	Surprise_Smile	Surprise_Jump	Surprise_Cry	Surprise_Recoil	Surprise_Hide	Sad_Scream	Sad_Smile	Sad_Jump	Sad_Cry	Sad_Recoil	Sad_Hide	Fear_Scream	Fear_Smile	Fear_Jump	Fear_Cry	Fear_Recoil	Fear_Hide	Anger_Scream	Anger_Smile	Anger_Jump	Anger_Cry	Anger_Recoil	Anger_Hide	Disgust_Scream	Disgust_Smile	Disgust_Jump	Disgust_Cry	Disgust_Recoil	Disgust_Hide	Happy_Typical	Happy_Atypical	Surptise_Typical	Surprise_Atypical	Sad_Typical	Sad_Atypical	Fear_Typical	Fear_Atypical
3	3	2	1	20	1	4	5	5	4	4	2	4	2	4	3	5	1	1	3	1	5	1	3	5	1	5	3	4	5	5	2	2	3	3	1	4	2	2	4	1	4	5	3.8	4	3	5	1.8	5	3.6
5	3	2	1	21	2	5	5	5	4	1	1	5	5	5	4	1	1	5	1	4	5	1	5	5	1	5	5	1	5	5	1	5	5	1	5	5	1	4	5	1	5	5	3.2	5	3.2	5	3.2	5	3.4
7	3	2	1	31	2	2	5	4	4	2	1	2	2	4	2	2	2	2	2	2	4	2	4	4	2	2	4	2	5	5	2	4	4	4	4	5	2	4	4	4	2	5	2.6	4	2	4	2.4	5	2.8
9	3	2	1	50	2	3	5	3	3	1	2	3	4	4	3	1	3	3	1	3	5	1	4	3	3	3	5	5	4	3	2	3	3	1	3	3	3	3	3	5	4	5	2.4	4	2.8	5	2.4	4	3.8
11	3	2	1	35	1	4	5	4	4	1	2	5	2	4	1	4	2	3	2	1	5	1	4	5	1	4	4	5	5	2	1	2	1	4	3	4	1	2	2	5	2	5	3	4	2.8	5	2.2	5	3.8
13	3	2	1	35	1	4	4	3	3	1	2	4	4	4	4	4	2	2	2	2	4	1	3	4	2	4	4	4	5	3	2	3	3	2	3	2	1	4	2	4	2	4	2.6	4	3.6	4	2	5	3.6
17	3	2	1	52	2	3	4	4	4	1	1	4	4	5	4	3	3	2	1	1	4	1	4	2	1	2	4	5	5	4	1	4	2	1	2	2	1	2	2	5	4	4	2.6	5	3.6	4	1.8	5	2.8
19	3	2	1	30	2	2	5	1	2	1	1	4	1	5	2	4	2	2	2	1	5	1	4	4	2	5	4	5	5	5	2	2	1	2	2	2	1	2	1	5	1	5	1.4	5	2.6	5	2	5	4
21	3	2	1	26	2	5	5	5	4	1	1	5	5	5	4	1	1	1	1	1	5	1	5	5	1	5	5	4	5	5	1	1	4	4	3	4	1	4	4	5	2	5	3.2	5	3.2	5	1.8	5	4
23	3	2	1	45	2	2	5	1	1	1	2	4	3	4	2	3	2	1	1	1	4	1	3	4	3	3	3	5	4	3	1	1	3	3	3	2	1	1	2	5	2	5	1.4	4	2.8	4	1.4	4	3.6
25	3	2	1	32	2	3	5	2	3	1	3	3	3	5	3	4	3	3	1	2	5	3	4	5	1	5	4	5	5	4	1	3	3	3	3	3	1	4	3	5	3	5	2.4	5	3.2	5	2.6	5	4
29	3	2	1	25	2	3	5	3	2	1	1	3	4	4	3	2	1	1	1	1	5	1	3	5	1	5	2	4	4	4	1	1	4	2	3	1	1	1	3	5	1	5	2	4	2.6	5	1.4	4	3.4
31	3	2	1	29	2	2	5	2	2	2	2	4	3	5	2	4	2	2	1	2	4	2	2	4	1	5	4	4	5	5	1	2	2	4	2	2	1	2	3	4	2	5	2	5	3	4	1.8	5	3.6
33	3	2	1	36	2	5	5	5	4	1	4	4	5	1	1	5	1	1	3	1	5	1	4	5	1	4	4	4	5	4	1	4	1	4	1	1	3	1	1	5	1	5	3.8	1	3.2	5	2	5	3.6
35	3	2	1	23	1	5	5	3	3	2	3	4	3	5	2	5	3	2	1	3	5	3	4	4	2	5	3	4	5	5	2	3	4	3	3	4	2	3	3	5	3	5	3.2	5	3.4	5	2.6	5	3.6
37	3	2	1	32	2	3	4	3	3	3	2	4	3	3	3	5	3	3	3	3	4	3	3	4	3	3	3	4	4	3	3	3	3	3	3	3	3	3	3	4	2	4	2.8	3	3.6	4	3	4	3.4
39	3	2	1	23	1	4	5	4	5	2	2	5	3	5	2	4	2	2	2	1	5	2	5	4	2	4	4	5	5	5	2	2	4	4	2	4	1	4	2	5	2	5	3.4	5	3.2	5	2.4	5	3.8
41	3	2	1	45	2	3	5	3	3	2	1	4	3	4	3	4	2	2	1	3	5	2	4	4	1	3	3	4	4	4	1	2	2	3	3	4	1	2	1	5	2	5	2.4	4	3.2	5	2.4	4	3
43	3	2	1	25	2	4	5	4	2	2	2	4	3	4	3	2	3	3	1	2	5	4	4	3	2	2	4	5	5	4	2	2	4	4	3	4	1	1	2	4	3	5	2.8	4	3	5	2.8	5	3.2
45	3	2	1	25	2	5	5	4	4	1	1	4	4	5	4	5	2	2	1	1	5	1	4	4	1	1	4	5	5	5	1	1	5	4	1	4	1	1	4	5	2	5	3	5	3.8	5	1.8	5	3
2	1	1	2	18	2	4	4	4	4	3	3	4	3	3	3	3	3	2	2	2	4	2	5	4	3	4	2	3	2	4	2	4	4	4	4	5	1	1	1	1	1	4	3	3	3.2	4	2.6	2	3.2
4	1	1	2	40	1	1	5	1	1	1	1	1	1	4	1	4	1	1	1	1	4	1	1	1	1	1	1	4	4	4	1	1	1	1	1	1	1	1	1	4	1	5	1	4	1.6	4	1	4	1.6
6	1	1	2	19	1	3	5	4	2	3	1	4	1	1	1	2	1	2	3	1	3	2	4	3	1	1	1	1	2	1	3	1	1	2	1	1	4	1	1	3	1	5	2.6	1	1.8	3	2.4	2	1.4
8	1	1	2	50	2	3	3	3	3	3	3	3	3	5	4	3	3	1	1	1	5	1	4	3	3	3	4	3	5	1	1	1	1	1	1	3	3	3	3	3	3	3	3	5	3.2	5	1.6	5	3.2
10	1	1	2	19	2	5	5	5	5	2	5	5	5	5	5	5	5	1	2	2	1	1	1	5	2	5	5	5	5	5	2	2	5	2	2	5	2	5	5	2	2	5	4.4	5	5	1	1.4	5	4.4
12	1	1	2	23	2	2	5	3	3	1	1	4	3	4	2	3	2	3	1	1	5	3	4	3	1	3	4	4	4	4	1	3	4	2	2	3	1	3	4	5	4	5	2	4	2.8	5	2.4	4	3
14	1	1	2	25	1	1	5	1	1	1	1	1	1	3	1	1	1	1	1	1	1	1	1	3	2	2	1	3	2	2	1	1	1	1	1	1	1	1	1	3	1	5	1	3	1	1	1	2	2.2
16	1	1	2	49	2	3	5	1	1	1	1	4	4	3	3	3	3	2	2	2	5	2	4	3	2	1	4	4	4	4	2	2	4	4	4	4	1	3	4	4	2	5	1.4	3	3.4	5	2.4	4	2.8
18	1	1	2	21	2	2	5	4	2	1	1	3	3	4	2	3	1	2	1	1	5	2	5	5	1	4	3	4	4	4	1	1	4	1	3	3	1	3	2	4	2	5	2	4	2.4	5	2.2	4	3.4
20	1	1	2	23	2	1	5	4	2	1	2	5	1	5	2	4	2	1	1	1	5	2	4	5	2	5	4	4	5	4	1	2	4	2	2	5	2	4	4	5	2	5	2	5	2.8	5	1.8	5	4
22	1	1	2	55	2	1	3	3	1	1	1	1	1	1	1	1	1	1	1	1	3	1	1	1	1	1	1	1	1	5	1	1	1	1	1	3	3	3	3	3	3	3	1.4	1	1	3	1	1	1
24	1	1	2	24	2	3	5	1	1	1	1	4	4	4	3	2	1	1	1	1	5	2	4	4	1	4	4	4	4	4	1	1	4	1	3	2	1	2	2	4	1	5	1.4	4	2.8	5	1.8	4	3.4
26	1	1	2	21	2	3	4	4	1	1	1	4	4	4	3	2	2	2	3	1	3	5	4	5	2	4	3	2	5	4	1	3	3	4	4	3	1	3	1	1	3	4	2	4	3	3	3	5	3.2
28	1	1	2	28	2	3	5	2	1	1	1	4	3	4	1	4	1	1	1	1	5	2	2	2	1	4	4	4	4	3	2	1	4	1	1	1	2	1	1	0	1	5	1.6	4	2.6	5	1.4	4	3
30	1	1	2	29	2	3	5	2	1	1	1	3	3	5	3	3	3	1	1	2	5	4	5	4	1	4	4	4	5	5	1	3	2	3	3	3	1	4	1	5	3	5	1.6	5	3	5	2.6	5	3.4
32	1	1	2	24	2	3	5	3	4	2	2	4	4	5	3	4	3	3	1	2	5	4	3	5	2	5	5	4	4	4	1	3	4	3	3	4	1	3	3	4	3	5	2.8	5	3.6	5	2.6	4	4.2
34	1	1	2	27	2	1	5	2	3	1	1	3	4	4	1	2	2	1	1	1	3	1	4	4	2	4	3	5	3	4	1	1	3	1	2	3	1	3	3	4	3	5	1.6	4	2.4	3	1.6	3	3.6
38	1	1	2	23	2	1	5	1	4	1	1	5	4	5	4	4	2	2	2	1	5	3	2	4	2	5	3	4	4	4	2	2	4	2	4	3	2	2	2	4	2	5	1.6	5	3.8	5	2	4	3.6
40	1	1	2	24	2	1	5	1	1	1	1	4	3	5	2	1	1	2	1	1	4	3	3	3	1	1	4	4	4	4	1	1	5	2	1	4	1	1	1	4	4	5	1	5	2.2	4	2	4	2.6
42	1	1	2	23	2	3	5	3	3	1	1	5	3	5	2	3	3	2	1	1	5	3	5	4	1	4	4	3	5	5	2	1	4	3	5	3	1	3	3	5	4	5	2.2	5	3.2	5	2.4	5	3.2
42	1	2	3	26	2	3	5	2	1	2	1	4	4	5	3	4	2	1	2	2	5	1	2	5	2	3	3	4	4	3	2	2	4	3	3	2	1	3	4	4	2	5	1.8	5	3.4	5	1.6	4	3.4
44	1	2	3	22	3	2	5	1	2	1	2	5	4	5	2	5	1	2	2	1	4	1	5	4	1	5	4	5	5	5	2	2	5	2	5	2	1	2	1	5	1	5	1.6	5	3.4	4	2.2	5	3.8
46	1	2	3	26	1	2	5	3	2	1	1	2	1	2	1	5	1	1	1	1	4	1	5	1	3	1	1	2	4	4	1	1	2	1	4	1	1	1	2	2	1	5	1.8	2	2	4	1.8	4	1.6
48	1	2	3	21	1	4	5	3	1	1	1	5	5	5	1	4	3	1	1	1	5	3	4	4	1	5	1	5	5	5	1	1	1	4	3	5	1	1	1	5	4	5	2	5	3.6	5	2	5	3.2
50	1	2	3	18	1	4	4	4	3	1	4	2	4	1	2	2	1	1	2	1	4	1	1	4	1	2	4	4	4	4	2	2	1	4	3	1	1	1	1	5	1	4	3.2	1	2.2	4	1.2	4	3
52	1	2	3	49	2	4	5	3	3	2	1	5	5	5	3	1	3	1	1	1	0	2	5	5	1	5	5	3	5	4	1	3	4	5	3	3	1	3	4	5	2	5	2.6	5	3.4	0	2	5	3.8
54	1	2	3	26	2	4	5	5	2	1	4	5	4	5	2	5	1	2	2	1	5	3	4	5	1	1	4	4	4	4	2	1	5	2	2	2	1	1	4	5	1	5	3.2	5	3.4	5	2.4	4	3
56	1	2	3	20	1	1	4	3	1	1	1	4	1	4	1	5	4	1	3	3	5	3	4	4	3	3	4	5	4	4	2	3	3	5	4	2	3	3	1	5	4	4	1.4	4	3	5	2.8	4	3.8
58	1	2	3	23	3	2	4	3	2	2	2	4	3	4	2	4	2	2	4	1	5	1	5	4	1	1	2	4	4	4	2	1	3	4	4	2	2	1	2	4	2	4	2.2	4	3	5	2.6	4	2.4
60	1	2	3	46	1	3	5	5	3	3	1	4	3	4	2	4	3	3	1	2	5	3	4	3	3	4	1	4	3	3	3	1	2	2	3	1	3	1	1	5	2	5	3	4	3.2	5	2.6	3	3
62	1	2	3	19	1	1	5	1	1	1	1	1	4	1	1	4	1	1	2	1	4	1	1	4	1	1	1	4	4	1	2	1	1	1	3	1	1	1	1	4	1	5	1	1	2.2	4	1.2	4	2.2
64	1	2	3	19	2	3	5	3	3	1	1	4	4	5	2	2	2	1	1	2	5	4	4	4	1	5	4	4	5	4	1	2	4	4	3	1	1	2	3	5	2	5	2.2	5	2.8	5	2.4	5	3.6
66	1	2	3	20	1	3	4	3	1	1	3	2	4	3	1	3	1	2	2	3	4	3	4	4	2	3	2	2	4	3	2	3	4	4	1	4	3	3	1	4	1	4	2.2	3	2.2	4	2.8	4	2.6
68	1	2	3	18	1	2	4	4	1	2	2	4	4	3	2	4	2	1	4	1	5	2	4	3	1	2	4	4	4	4	2	3	2	2	2	1	1	1	2	4	1	4	2.2	3	3.2	5	2.4	4	2.8
70	1	2	3	24	2	4	5	4	2	2	2	4	5	5	4	4	4	1	3	1	5	3	4	4	1	5	4	5	5	4	1	4	5	2	3	2	1	2	3	4	3	5	2.8	5	4.2	5	2.4	5	3.8
72	1	2	3	41	2	3	5	1	3	1	1	5	2	4	2	4	1	1	3	1	5	1	3	4	1	1	4	4	2	4	2	1	5	4	3	2	1	1	4	5	1	5	1.8	4	2.8	5	1.8	2	2.8
74	1	2	3	21	1	1	5	3	1	1	1	3	4	5	1	3	1	4	1	1	5	1	1	1	1	1	1	5	5	5	3	1	1	1	1	1	1	1	1	5	1	5	1.4	5	2.4	5	1.6	5	1.8
76	1	2	3	33	1	1	5	4	1	1	1	4	2	4	1	5	1	1	2	1	5	1	1	3	2	4	2	4	5	5	1	3	2	2	1	1	1	1	1	4	1	5	1.6	4	2.6	5	1.2	5	3
78	1	2	3	26	1	4	4	4	4	2	3	4	4	4	3	4	3	3	2	2	5	2	4	4	2	4	4	4	4	4	3	4	4	3	3	4	2	2	3	4	3	4	3.4	4	3.6	5	2.6	4	3.6
80	1	2	3	25	2	4	4	3	4	2	2	4	3	4	4	4	2	3	4	2	4	3	4	4	3	4	4	5	5	3	3	2	4	4	3	4	2	4	4	5	3	4	3	4	3.4	4	3.2	5	4
82	1	2	3	20	1	4	5	4	1	2	2	5	4	4	4	4	2	4	2	1	5	3	1	4	1	3	5	4	4	5	4	3	5	5	4	4	1	1	4	5	3	5	2.6	4	3.8	5	2.2	4	3.4
84	1	2	3	25	2	3	5	5	3	3	2	3	4	4	4	2	2	2	2	2	5	2	4	5	2	3	3	4	4	5	2	1	2	4	1	2	1	1	3	5	2	5	3.2	4	3	5	2.4	4	3.4
86	1	2	3	28	2	3	5	3	3	1	2	3	3	4	3	3	2	3	1	1	5	2	5	4	1	4	4	4	4	4	2	2	5	2	4	2	1	2	3	5	3	5	2.4	4	2.8	5	2.4	4	3.4
88	1	2	3	55	2	1	5	1	1	1	1	3	3	4	1	1	1	3	1	1	5	1	1	1	1	3	1	1	5	5	1	1	1	1	1	1	1	1	1	1	1	5	1	4	1.8	5	1.4	5	1.4
90	1	2	3	45	2	4	5	3	4	1	1	4	4	5	4	4	2	4	1	3	5	3	4	4	1	5	4	4	5	5	2	4	4	4	4	4	1	4	4	5	4	5	2.6	5	3.6	5	3	5	3.6
92	1	2	3	27	1	1	5	1	4	1	1	5	2	5	1	4	1	1	2	1	5	1	4	1	1	1	1	2	4	1	2	1	4	1	4	1	1	1	1	5	1	5	1.6	5	2.6	5	1.8	4	1.2
47	3	1	4	18	2	3	5	2	2	1	1	3	3	4	4	5	4	1	1	2	4	2	3	4	1	3	4	4	5	4	1	2	3	2	1	2	1	4	2	5	3	5	1.8	4	3.8	4	1.8	5	3.2
49	3	1	4	18	2	2	5	1	4	3	2	4	5	1	4	3	2	4	2	3	4	4	4	4	2	2	4	3	4	4	2	2	4	3	2	3	2	2	4	4	4	5	2.4	1	3.6	4	3.4	4	3
51	3	1	4	36	2	5	5	5	5	2	2	5	5	5	5	1	1	4	1	1	5	1	4	5	2	5	5	5	5	4	4	2	4	1	4	4	2	2	2	5	2	5	3.8	5	3.4	5	2.2	5	4.4
53	3	1	4	19	2	2	4	1	3	2	2	3	3	4	2	4	4	1	2	1	4	3	4	4	1	4	3	4	5	4	2	3	3	3	3	3	1	3	3	4	4	4	2	4	3.2	4	2.2	5	3.2
55	3	1	4	18	2	5	5	5	4	1	1	2	2	5	4	5	4	2	2	2	5	4	5	5	1	5	5	5	4	3	3	1	4	1	1	5	1	4	2	5	2	5	3.2	5	3.4	5	3	4	4.2
57	3	1	4	18	2	3	5	3	1	1	1	3	3	4	2	4	3	4	1	1	5	2	5	4	1	3	3	4	5	4	1	1	3	1	2	3	1	2	3	4	4	5	1.8	4	3	5	2.6	5	3
59	3	1	4	18	1	3	5	3	1	1	1	4	3	5	2	5	2	3	2	1	4	3	4	3	1	3	4	2	5	5	1	2	3	2	3	4	1	2	3	5	2	5	1.8	5	3.2	4	2.6	5	2.6
61	3	1	4	24	2	2	5	2	4	1	1	3	4	4	3	1	1	1	1	1	4	1	3	3	1	4	3	4	4	4	1	1	2	1	1	3	1	1	1	5	1	5	2	4	2.4	4	1.4	4	3
63	3	1	4	19	2	3	5	4	3	1	2	4	3	4	3	3	2	3	2	2	5	3	3	4	2	4	4	4	4	4	3	2	4	2	3	3	2	2	3	4	3	5	2.6	4	3	5	2.6	4	3.6
65	3	1	4	30	2	1	5	5	3	1	1	3	5	4	3	1	1	4	1	2	5	5	4	4	1	5	5	4	5	4	2	1	4	4	4	3	1	2	3	4	4	5	2.2	4	2.6	5	3.2	5	3.8
67	3	1	4	20	2	1	5	4	2	1	1	3	1	1	2	5	4	3	1	2	4	2	3	4	2	2	4	5	5	4	1	2	4	2	2	2	2	2	2	5	4	5	1.8	1	3	4	2.2	5	3.4
69	3	1	4	27	1	4	5	4	5	2	2	5	4	5	4	5	5	2	1	2	5	3	5	4	1	1	5	4	5	5	1	4	2	2	2	3	1	3	3	3	3	5	3.4	5	4.6	5	2.6	5	3
71	3	1	4	18	2	3	4	3	3	1	1	4	4	4	3	4	3	1	2	1	4	3	2	3	2	2	4	4	4	4	1	3	4	1	1	3	1	4	2	5	3	4	2.2	4	3.6	4	1.8	4	3
73	3	1	4	20	3	3	5	2	2	1	1	3	3	4	2	4	2	1	2	1	4	3	5	4	2	4	4	4	4	4	2	2	3	2	3	2	1	2	3	5	3	5	1.8	4	2.8	4	2.4	4	3.6
75	3	1	4	22	2	1	5	1	1	1	1	4	2	4	2	2	2	3	1	1	4	3	4	4	1	4	4	4	4	4	1	1	3	2	3	3	1	1	2	5	1	5	1	4	2.4	4	2.4	4	3.4
77	3	1	4	18	1	2	5	3	1	2	2	4	3	4	3	4	2	3	1	2	4	3	3	4	2	4	3	3	4	3	1	1	2	2	2	2	1	1	2	4	2	5	2	4	3.2	4	2.4	4	3.2
79	3	1	4	29	2	1	5	3	3	1	1	4	4	4	3	3	2	1	1	1	5	1	4	4	2	4	4	5	4	5	1	1	2	1	1	3	1	1	3	4	1	5	1.8	4	3.2	5	1.6	4	3.8
81	3	1	4	44	1	3	4	3	1	1	1	4	2	4	2	4	2	3	1	1	4	1	4	3	1	4	3	2	4	2	1	3	2	2	3	3	1	2	1	4	2	4	1.8	4	2.8	4	2	4	2.6
83	3	1	4	27	2	5	5	4	4	1	1	5	4	5	4	1	4	4	2	1	4	4	4	4	2	2	4	4	5	5	2	2	5	2	1	1	1	1	1	4	1	5	3	5	3.6	4	3	5	3.2
85	3	1	4	18	1	1	5	2	3	1	1	3	3	5	3	5	1	3	1	1	5	1	3	5	1	4	5	4	4	4	1	2	3	3	1	1	1	2	1	4	3	5	1.6	5	3	5	1.8	4	3.8
[truncated: 6 more columns]

## Sheet: data key
key
sex: 1(male), 2 (female)
Instruction Perspective: 3 (Third person instructions), 1 (first person instructions)
Rating Direction: 1 (category-to-verb), 2 (verb to category)
Rating Task: 1 (third person instructions, verb-to-category rating direction), 2 (first person instructions, category-to-verb rating direction), 3 (first person instructions, verb-to-category rating direction), 4 (third person instructions, category-to-verb rating direction).
